# Supplementary material
Source: publisher site journal article supplement (https://www.dovepress.com/article/467427)
Supplement: Supplementary file 1 [file get_supplementary_file.php]

**Development of a Spherical Nucleic Acid Nanovaccine for Enhanced Immunogenicity in Dengue Virus Infection**

# Supplementary Tables and Figures

Table S1 Nucleic acid sequence of CpG and CpG complement

| Name | Sequence（5′-3′） |
| --- | --- |
| CSV-1A | AACGTCAGGAACGTCATGGA-SH |
| CpG | T*C*C*A*T*G*A*C*G*T*T*C*C*T*G*A*C*G*T*T* -SH |


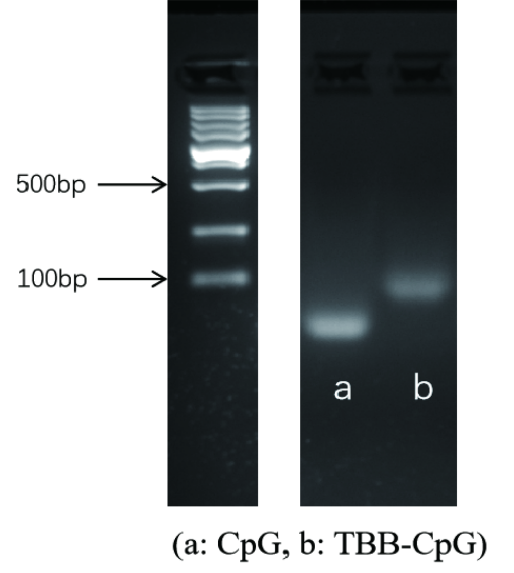


**Figure S1:** Typical agarose gel electropherograms of TBB-CpG (a: CpG, b: TBB-CpG).


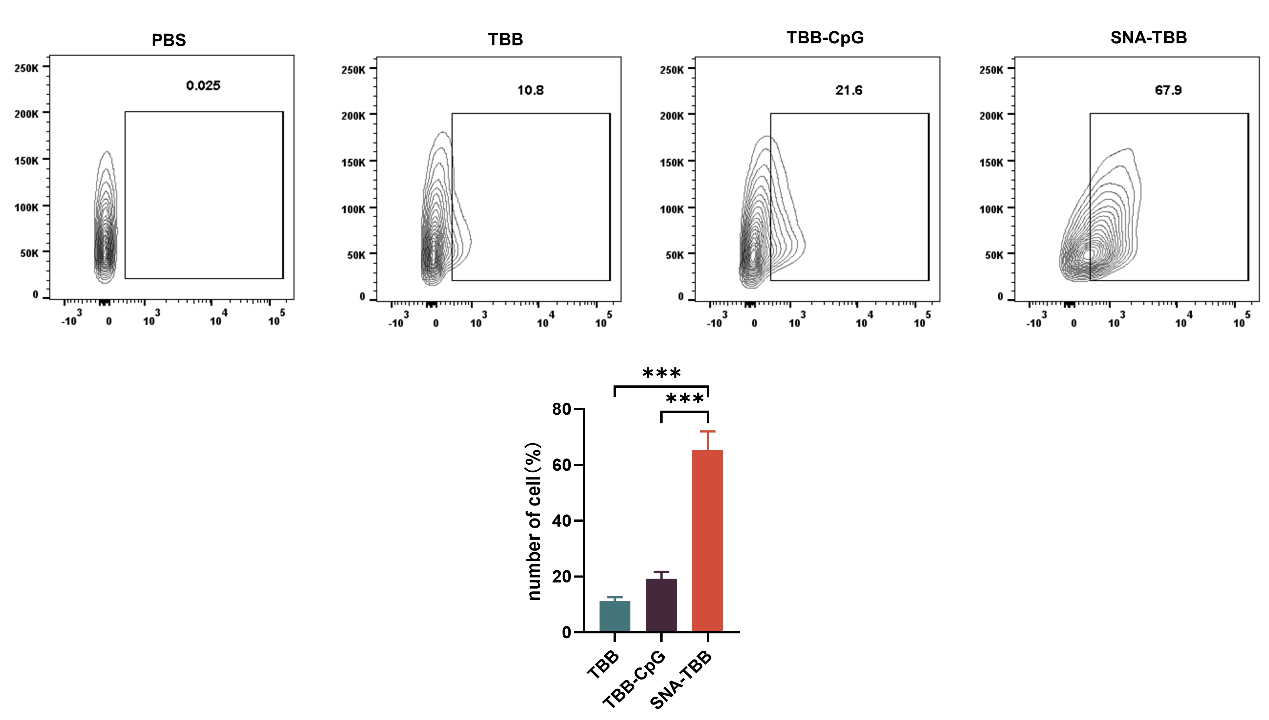


**Figure S2:** Flow cytometric analysis of antigen uptake by BMDCs.Data are presented as mean ± SD (n = 3). *p < 0.05, **p < 0.01, ***p < 0.001.


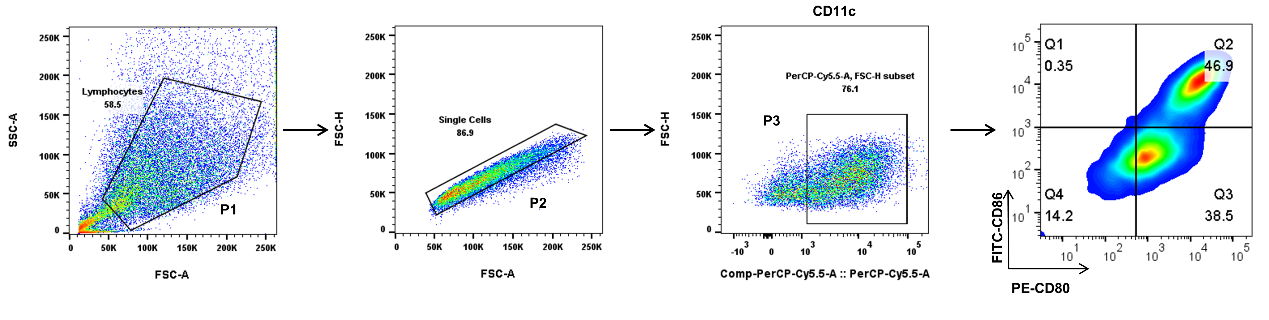


**Figure S3:** Flow cytometry gating strategy for Figure 2G.

Table S2 q-PCR primer sequence

| Primes | Sequences(5＇-3＇) |
| --- | --- |
| UBB-M-F | TTCGGTCTGCATTCCCAGTG |
| UBB-M-R | AACTTAAATTGGGGCAAGTGGC |
| CD80-M-F | ACAACAGCCTTACCTTCGG |
| CD80-M-R | GTGCTGAAAGAAAGATTGTACCTCA |
| CD86-M-F | GCAGCACGGACTTGAACAAC |
| CD86-M-R | CCTTTGTAAATGGGCACGGC |
| IL12b-M-F | GTCCTCAGAAGCTAACCATCTCC |
| IL12b-M-R | CCAGAGCCTATGACTCCATGTC |
| IL13-M-F | TGAGCAACATCACACAAGACC |
| IL13-M-R | GGCCTTGCGGTTACAGAGG |
| IL22-M-F | ATGAGTTTTTCCCTTATGGGGAC |
| IL22-M-R | GCTGGAAGTTGGACACCTCAA |
| ccl5-M-F | GCTGCTTTGCCTACCTCTCC |
| ccl5-M-R | TCGAGTGACAAACACGACTGC |
